# Supplementary material for: Heterogeneous ditopic ZnFe2O4catalyzed synthesis of 4H-pyrans: further conversion to 1,4-DHPs and report of functional group interconversion from amide to ester
Source: Royal Society of Chemistry journal article supplement (doi:10.1039/c3gc42095g), 2013-11-27

## Supporting Information Part IV for

### **Heterogeneous ditopic $\text{ZnFe}_2\text{O}_4$ catalyzed synthesis of 4*H*-pyrans: further conversion to 1,4-DHPs and report of functional group interconversion from amide to ester**

**Paramita Das<sup>a</sup>, Arghya Dutta<sup>b</sup>, Asim Bhaumik<sup>b</sup> and Chhanda Mukhopadhyay<sup>\*a</sup>**

*a* Department of Chemistry, University of Calcutta, 92 APC Road, Kolkata-700009, India. Tel: +91-9433019610;  
*b* Department of Materials Science, Indian Association for the Cultivation of Science, Jadavpur, Kolkata 700 032,  
India.

[cmukhop@yahoo.co.in](mailto:cmukhop@yahoo.co.in)

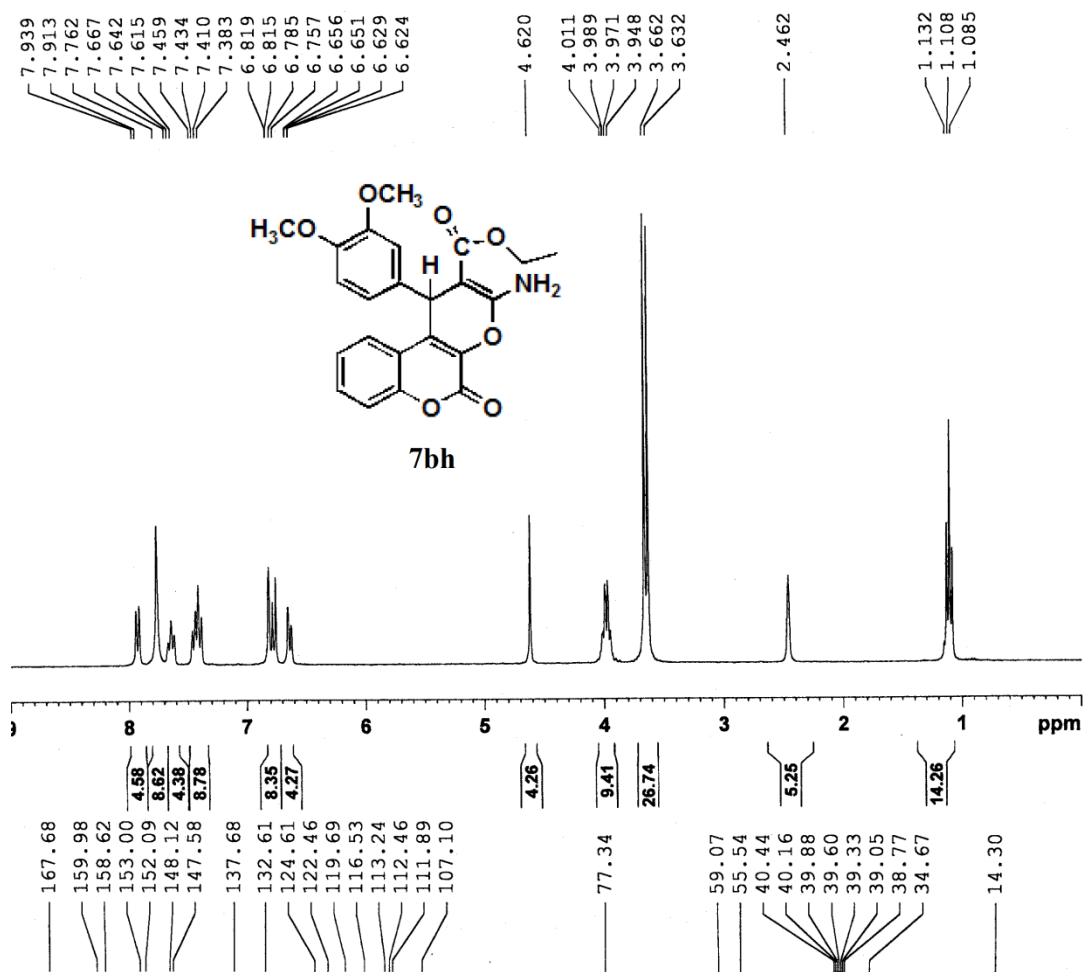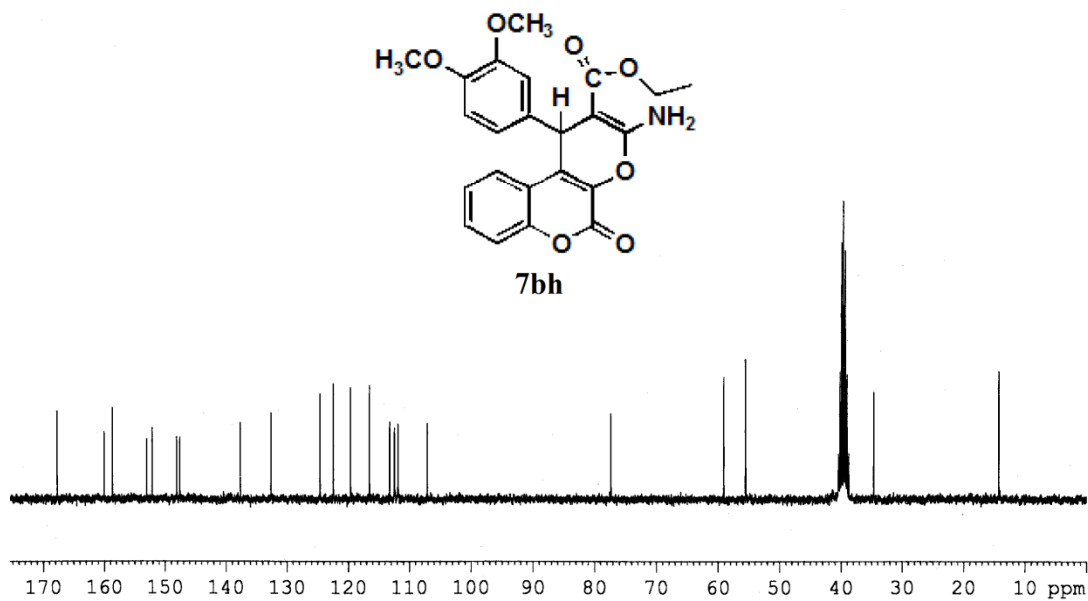

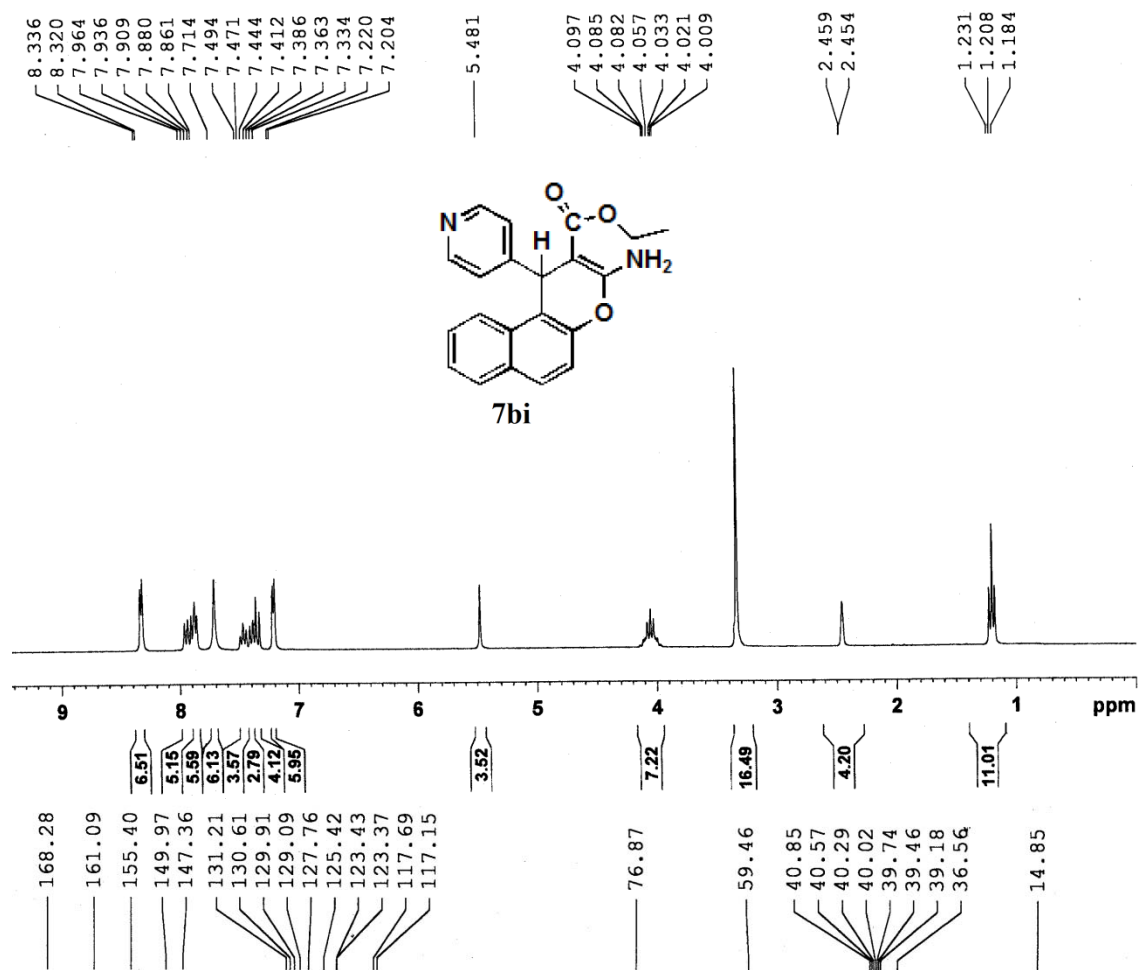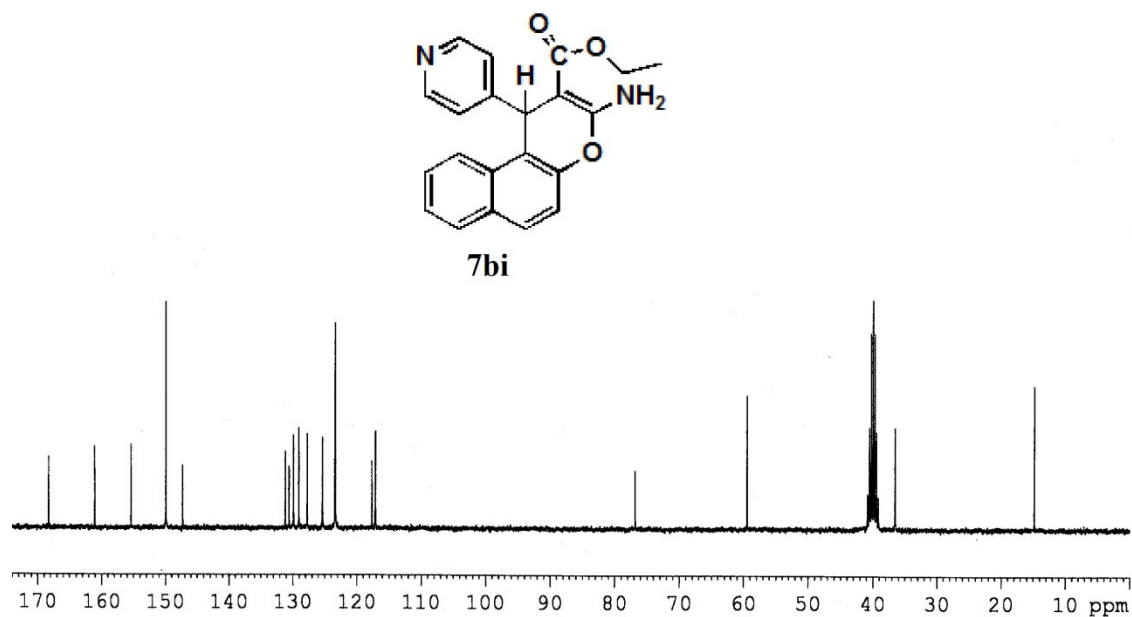

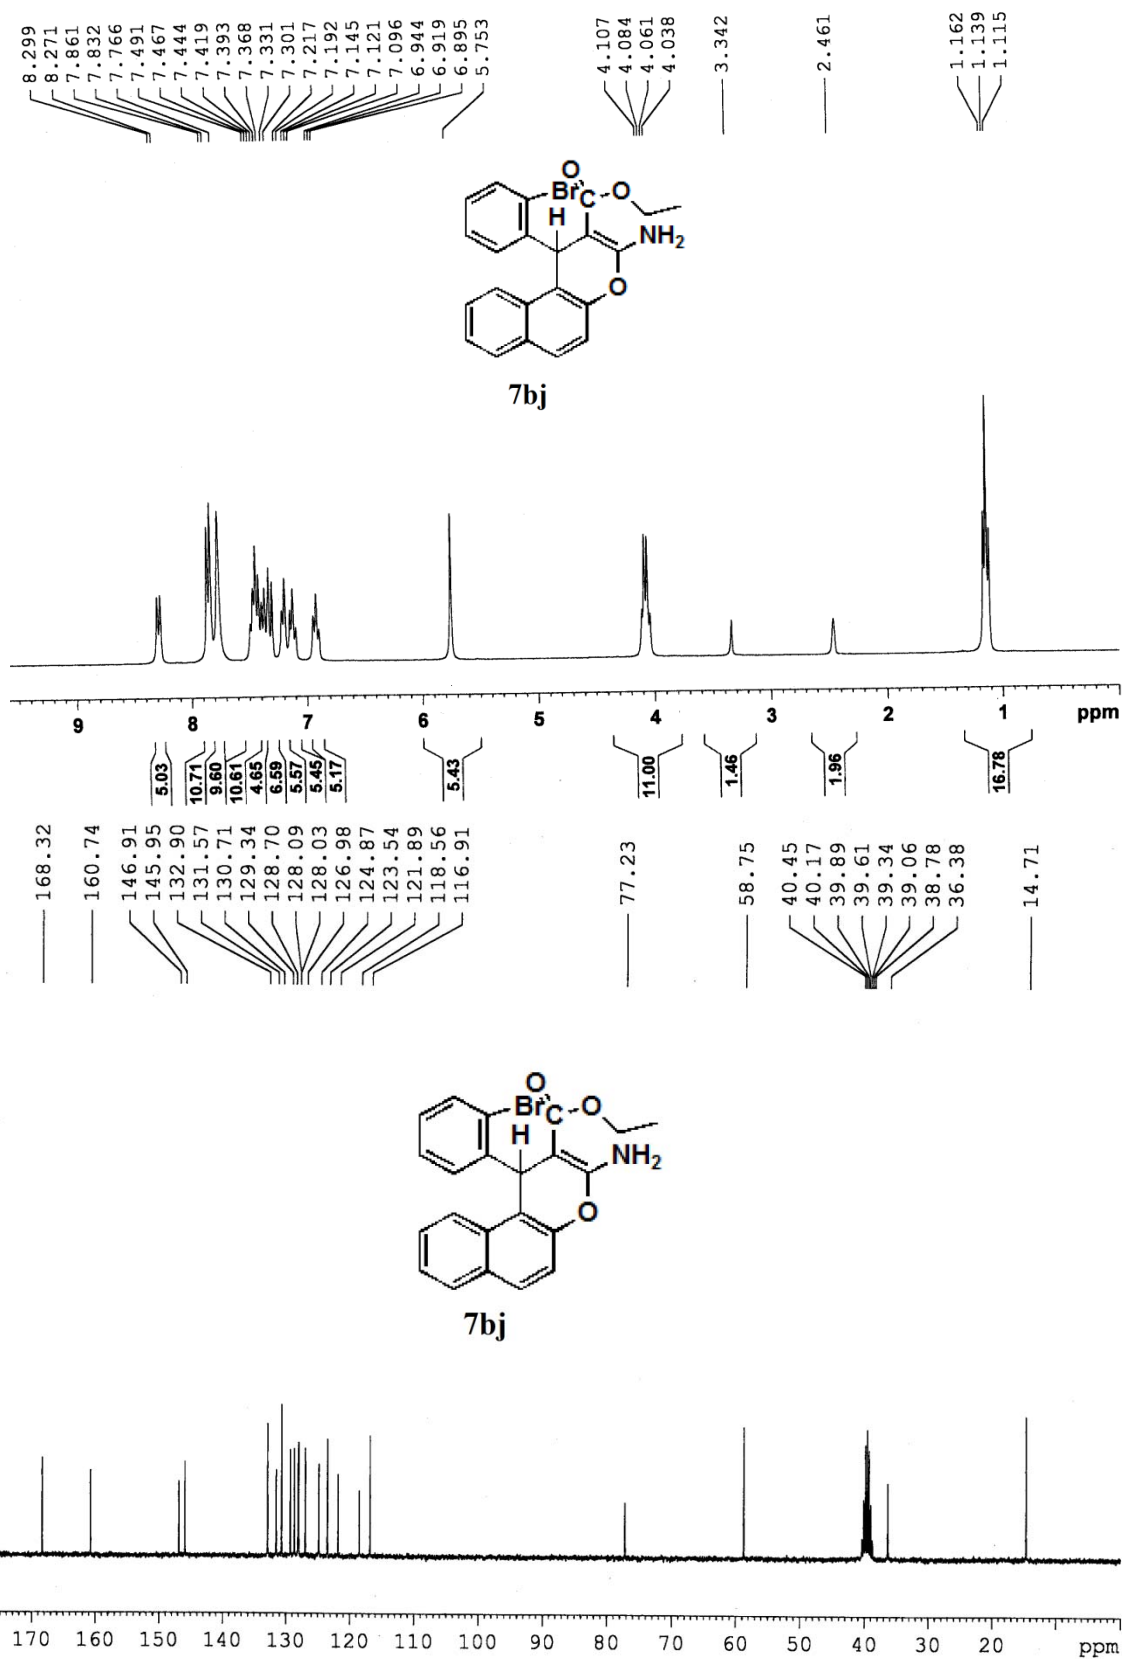

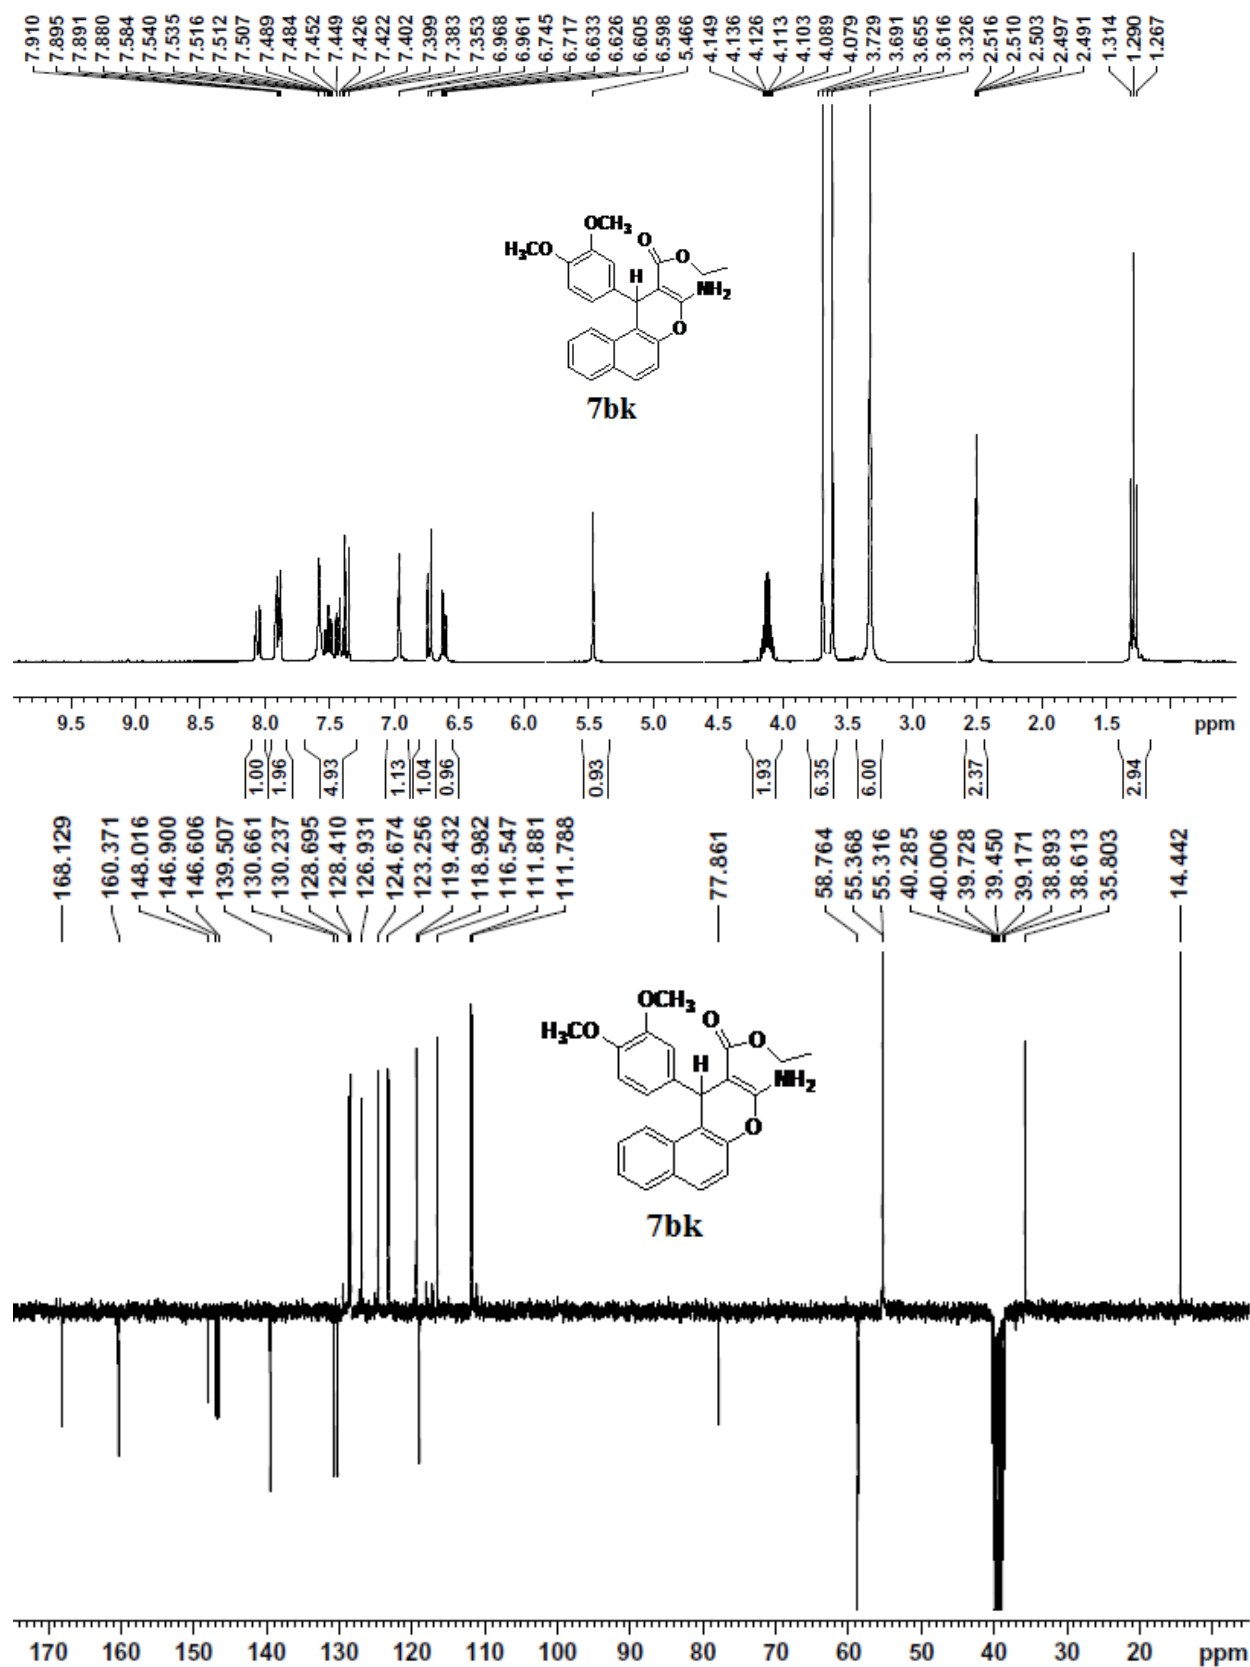

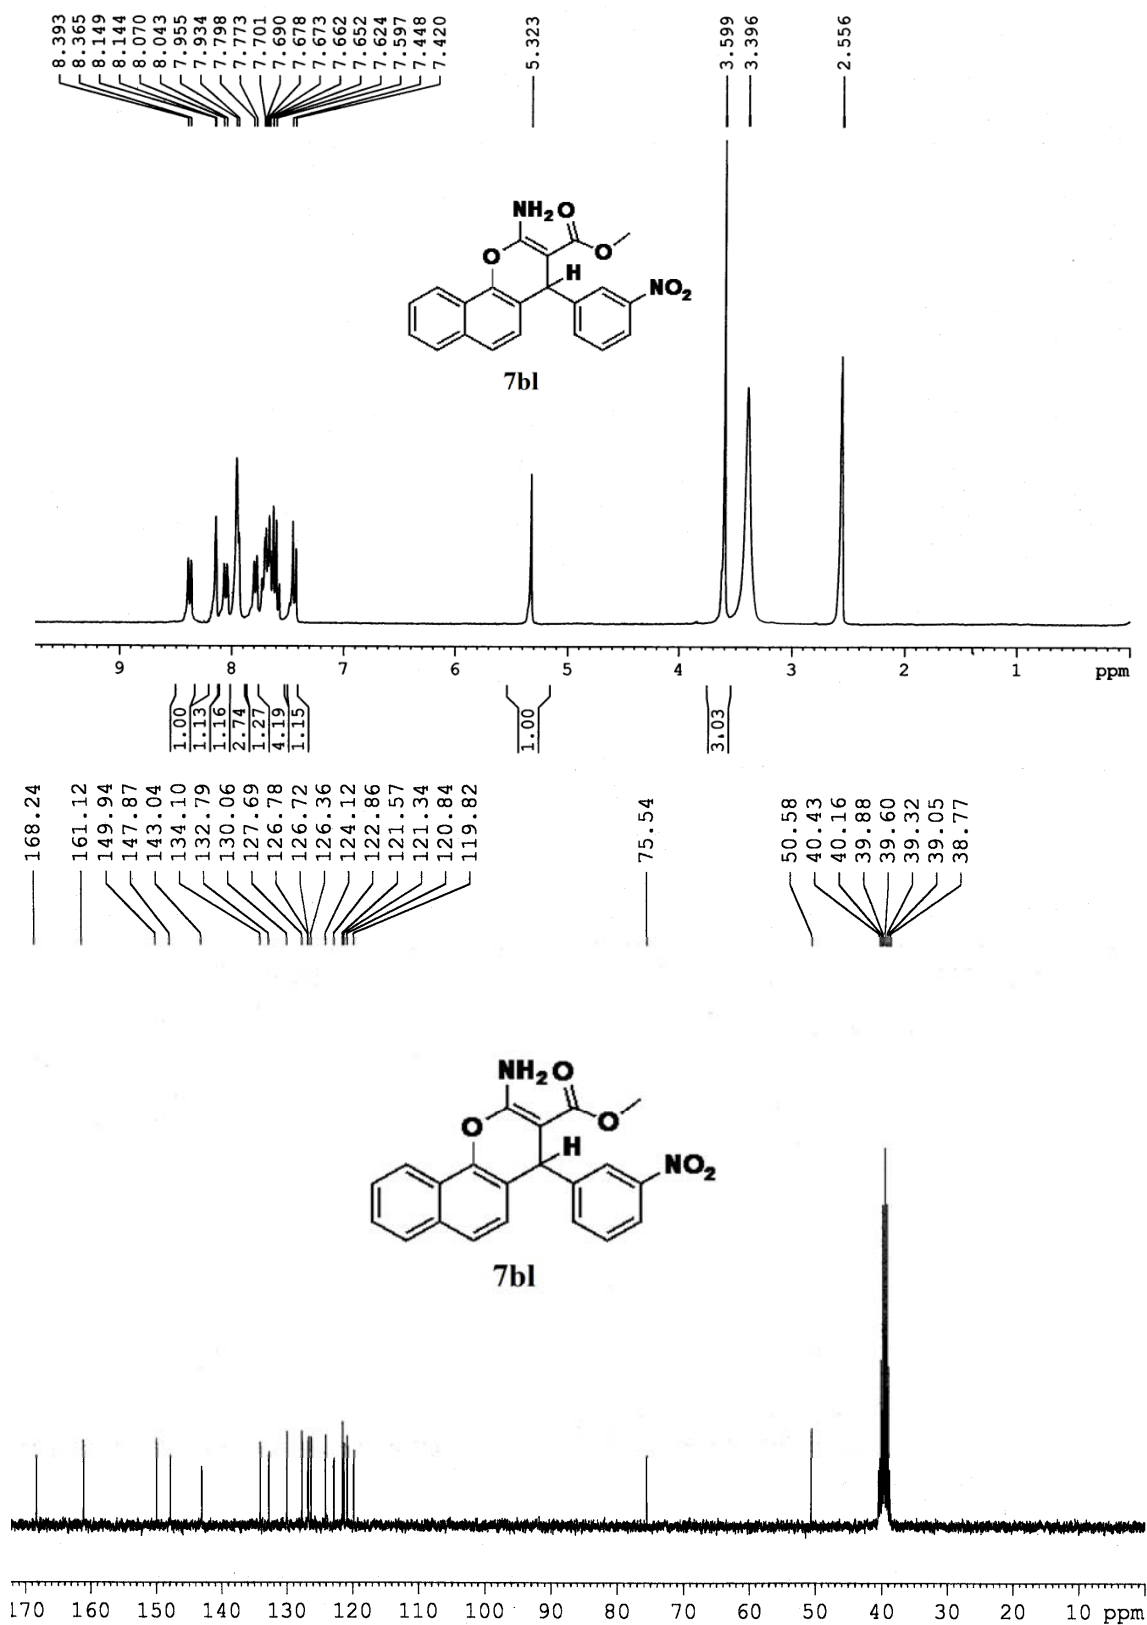

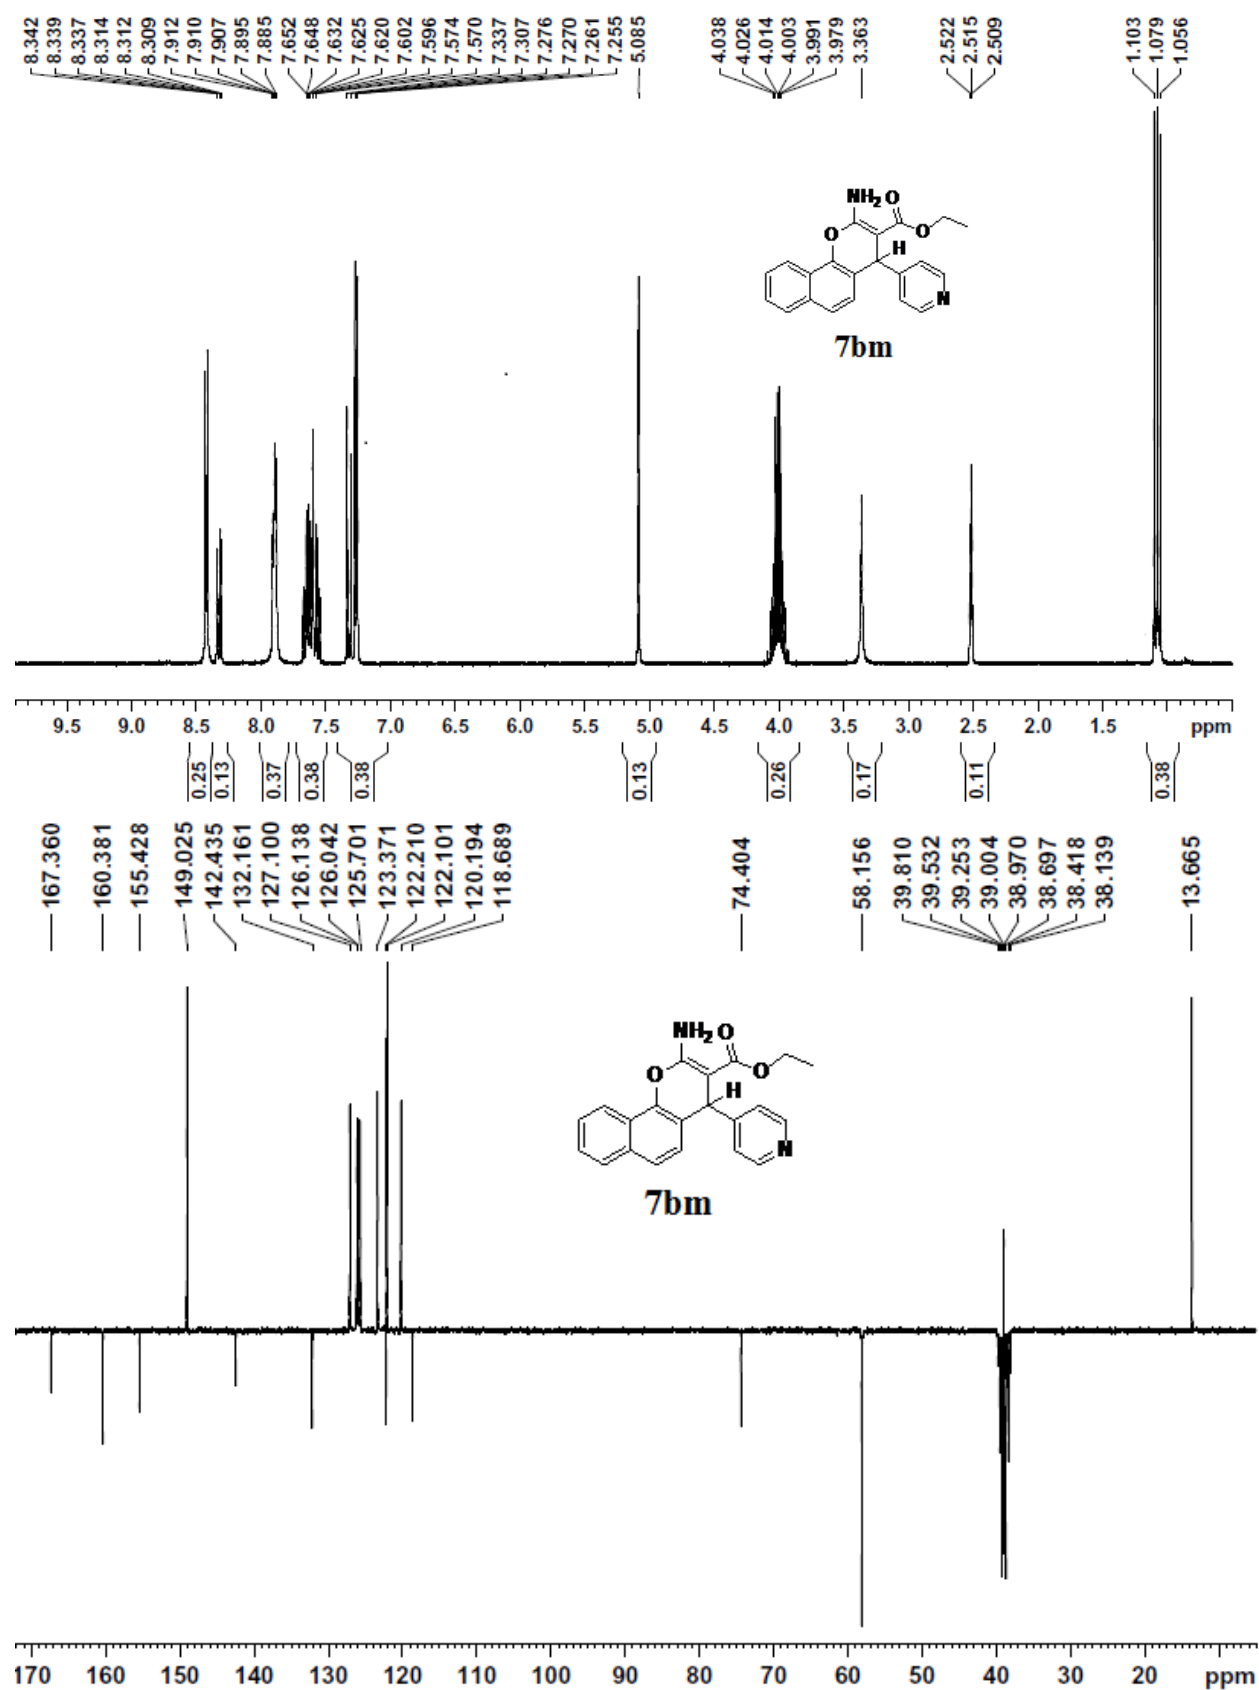

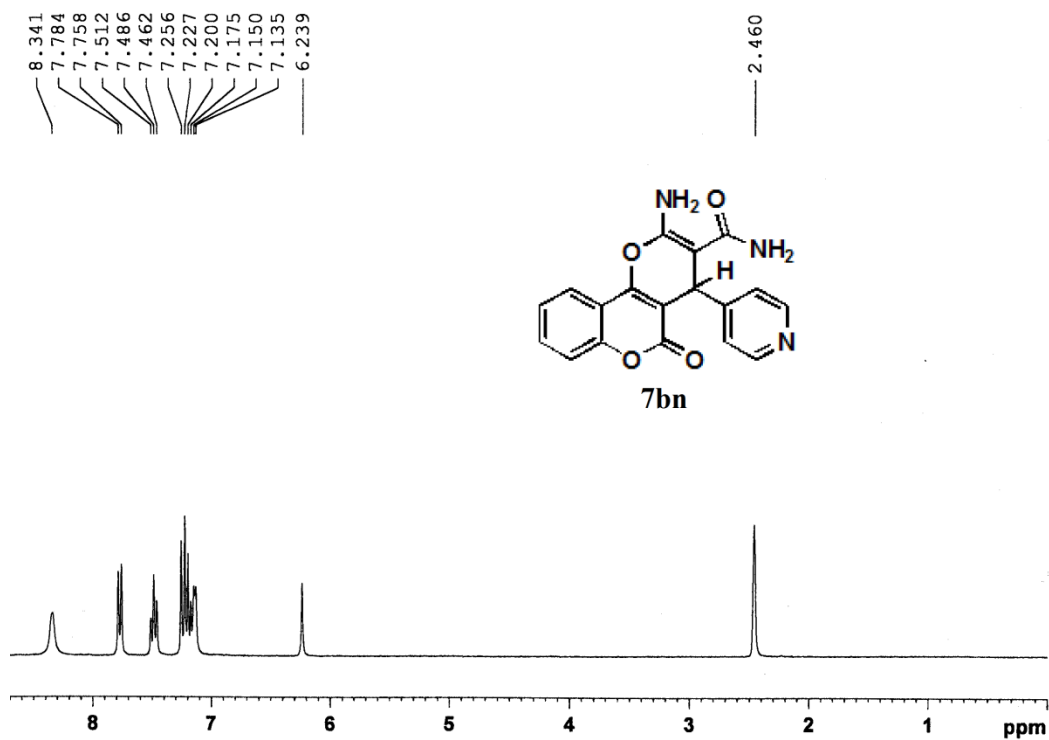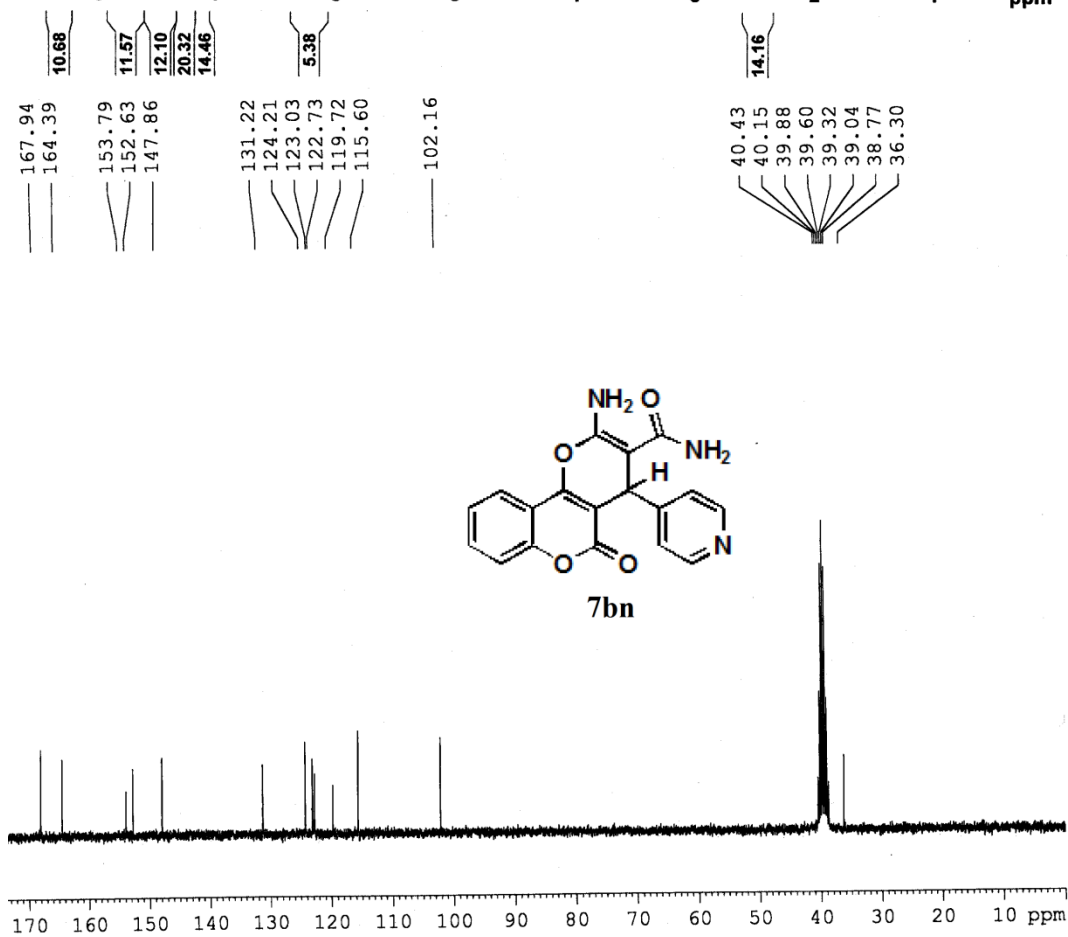



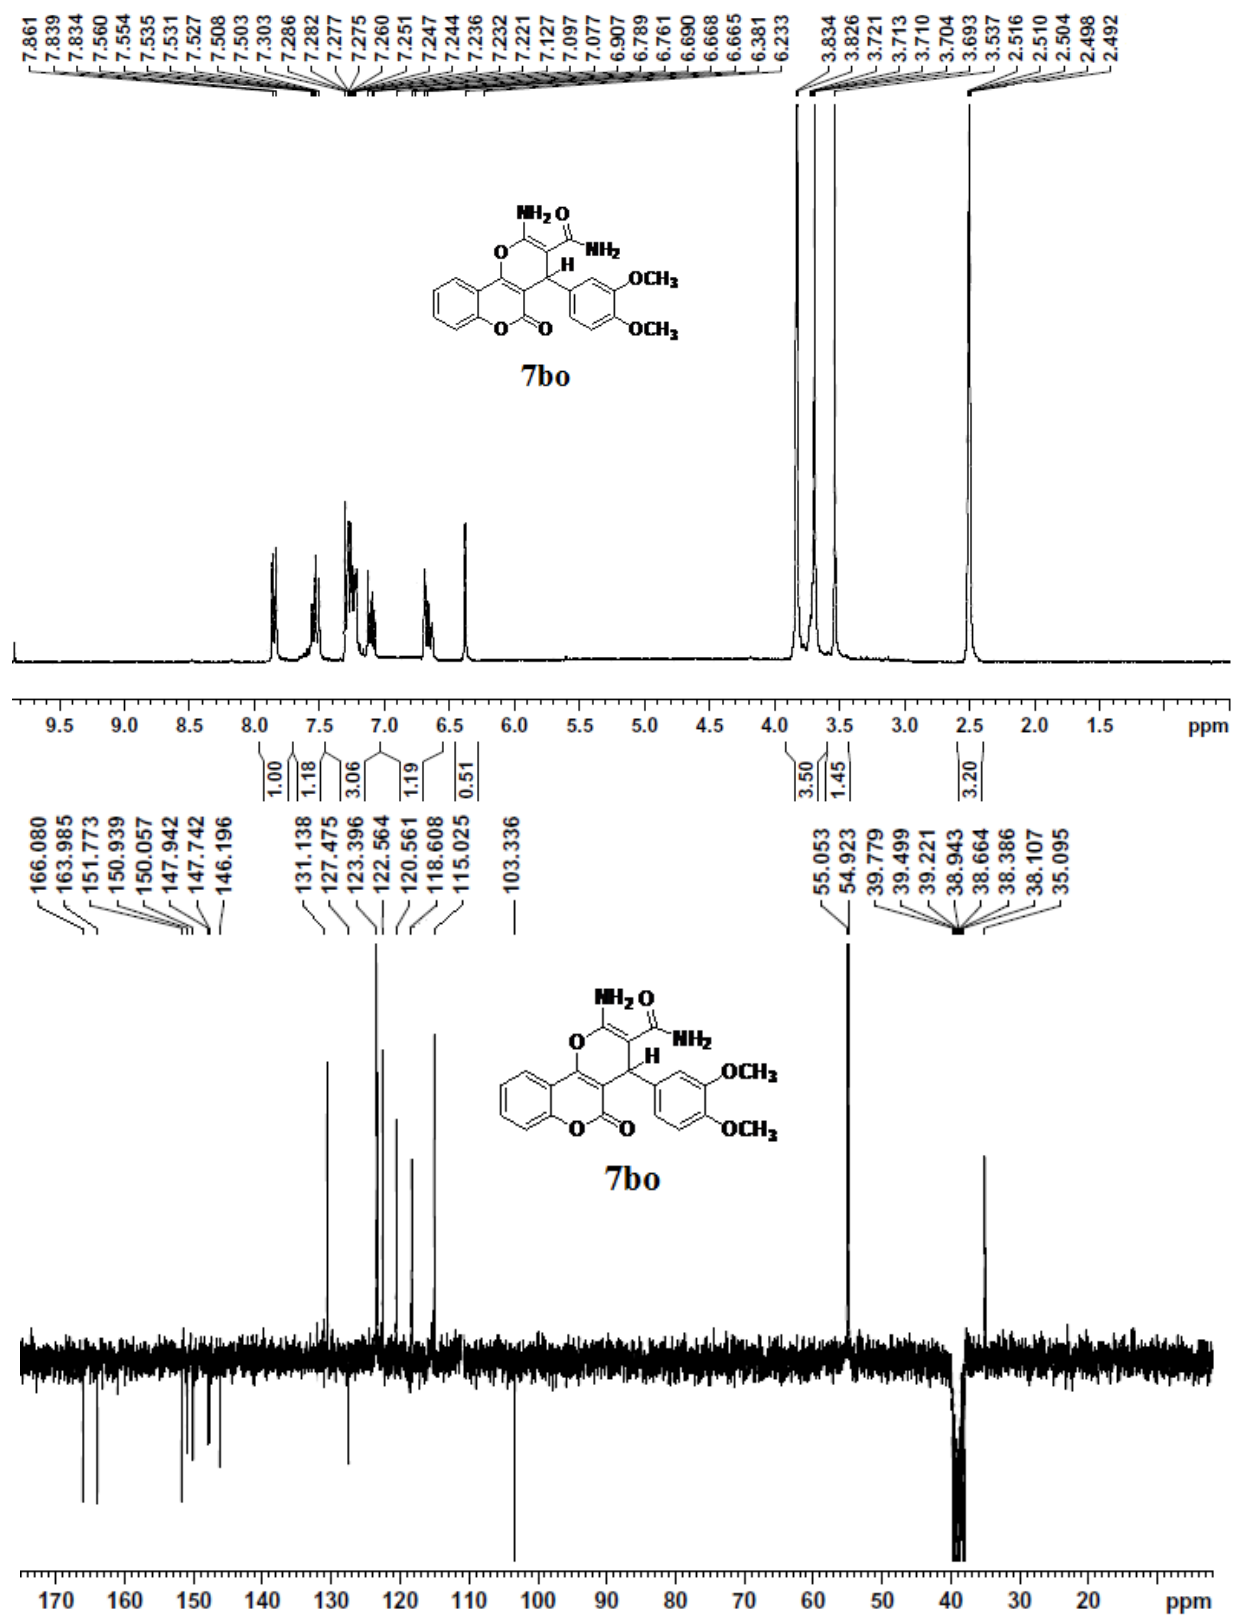

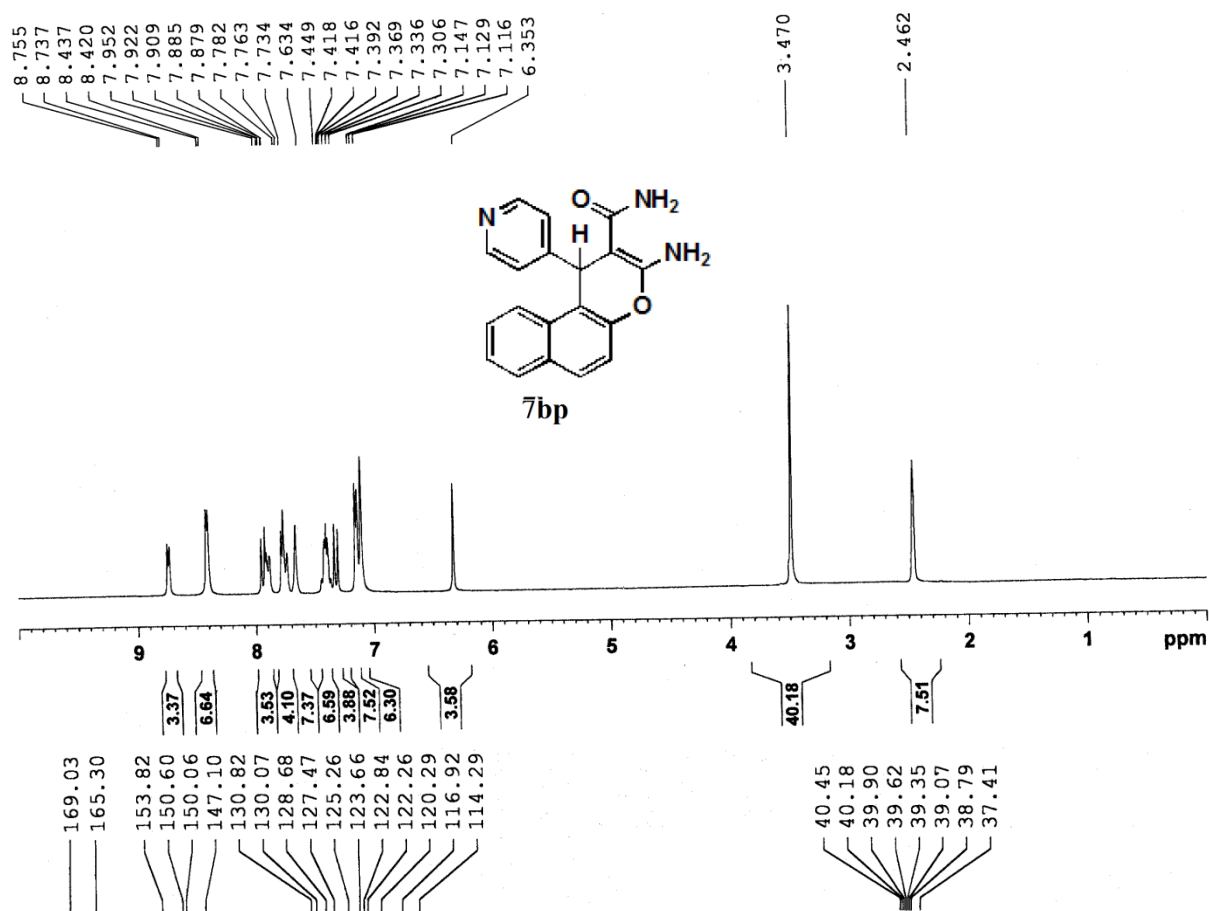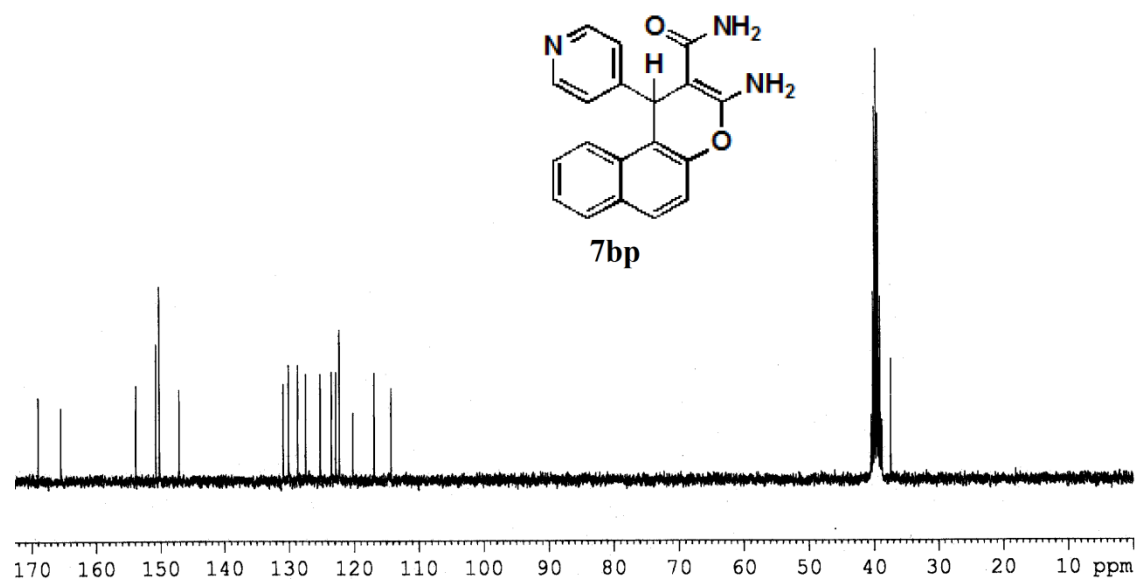

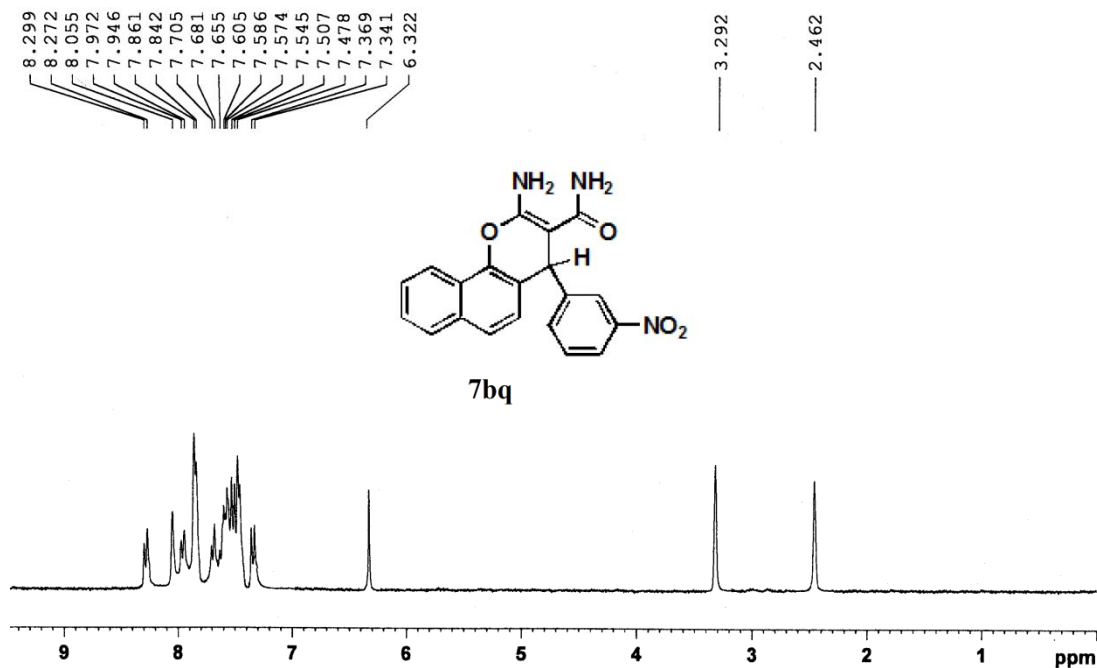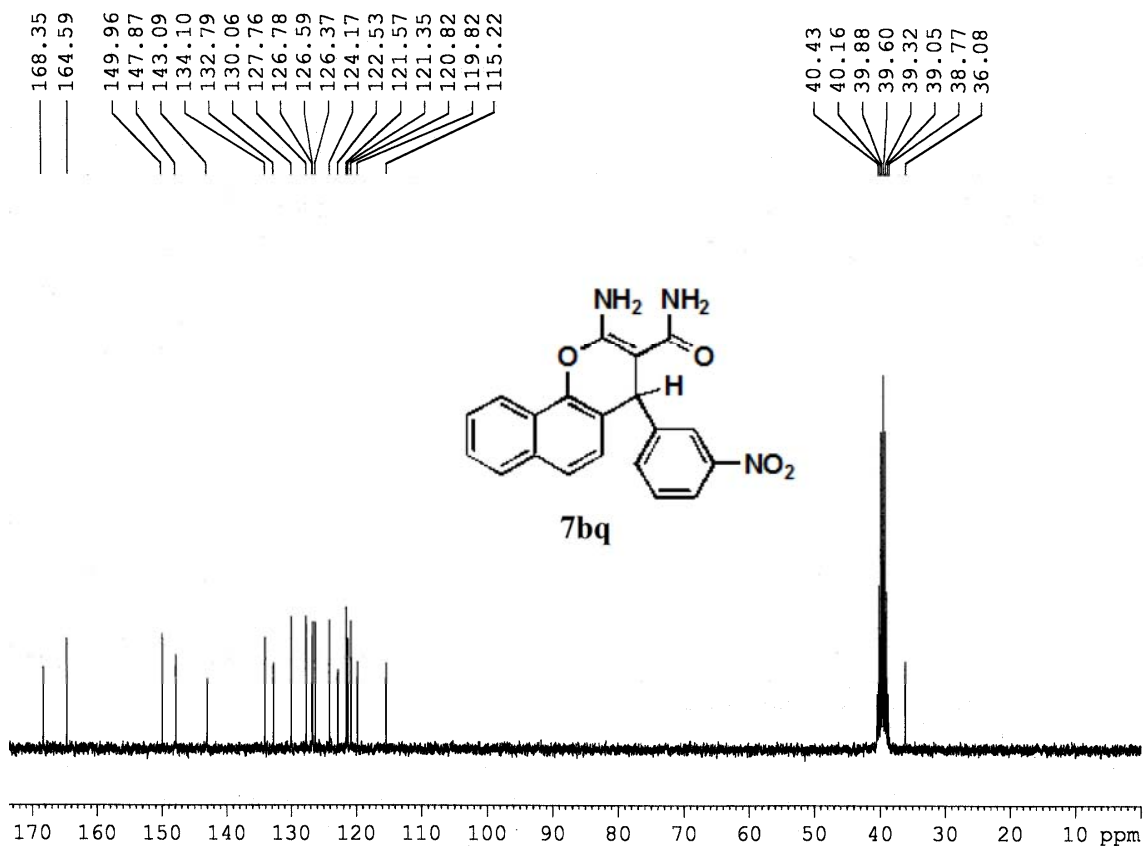

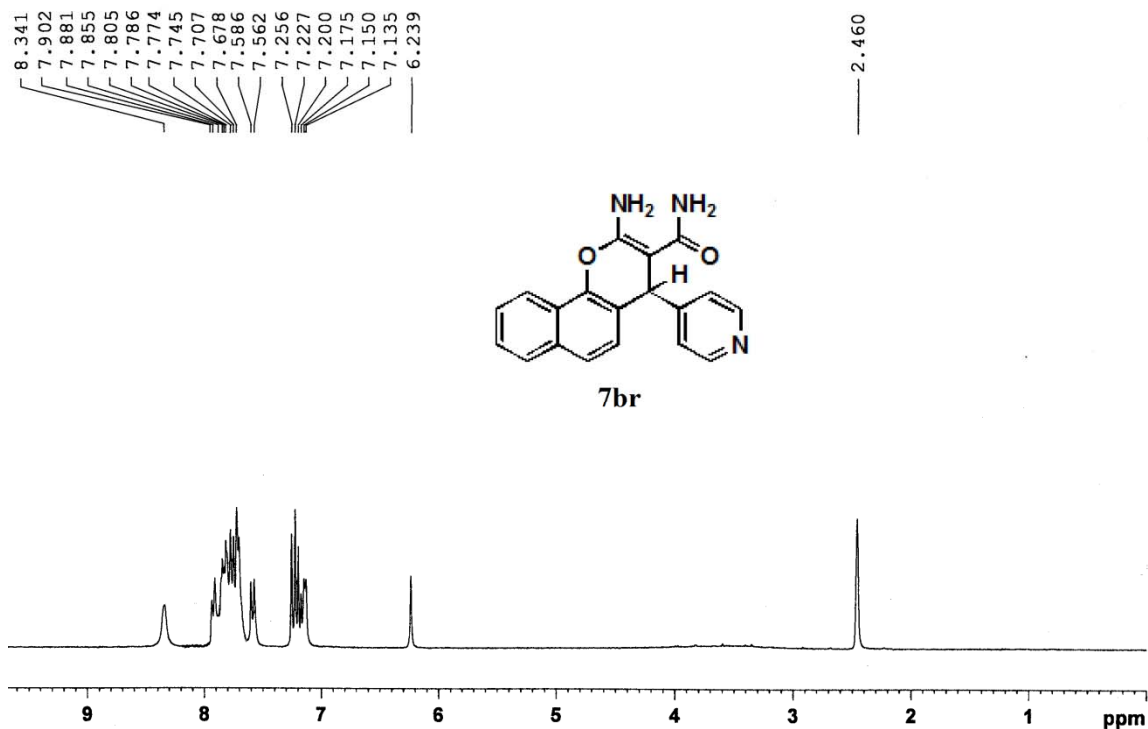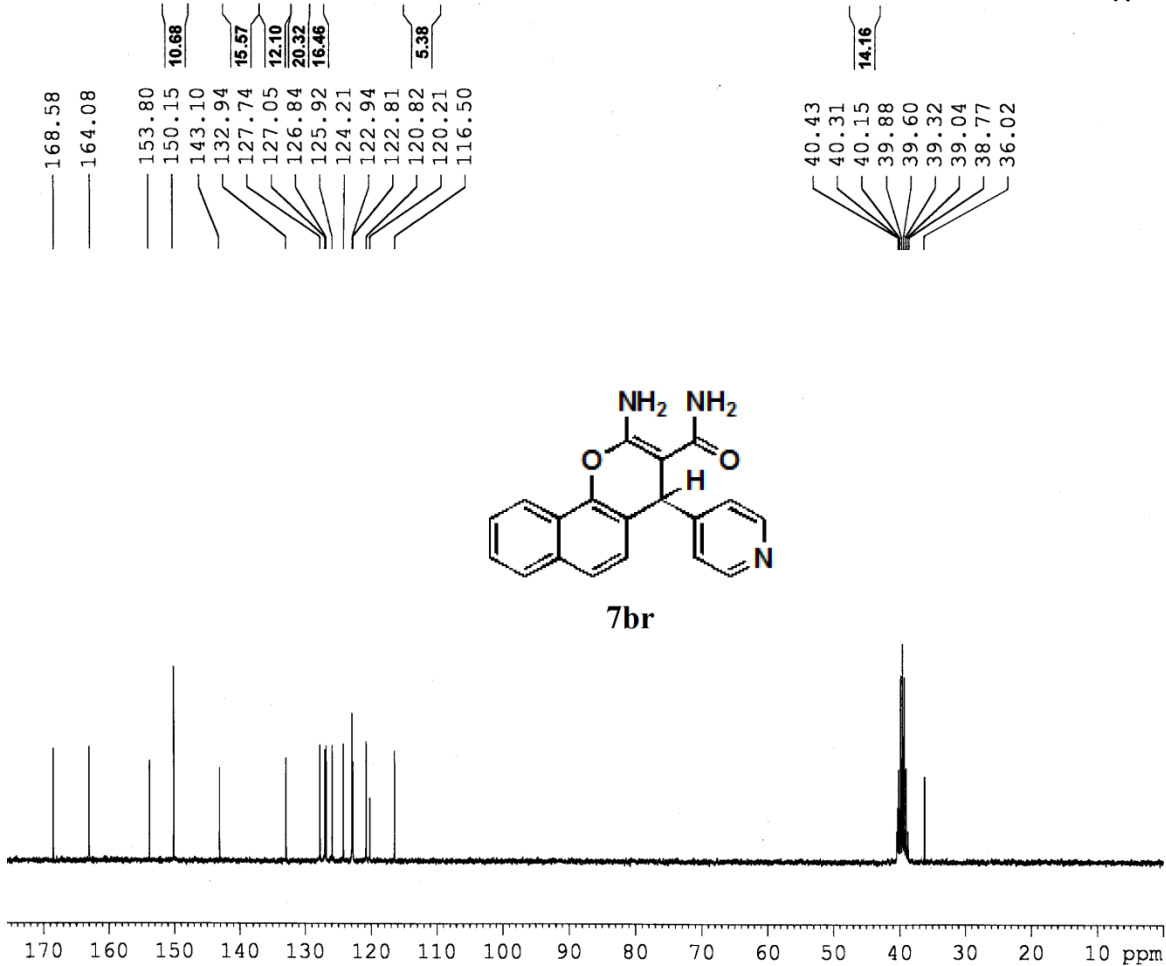

# 2D NMR spectrum of 7ae

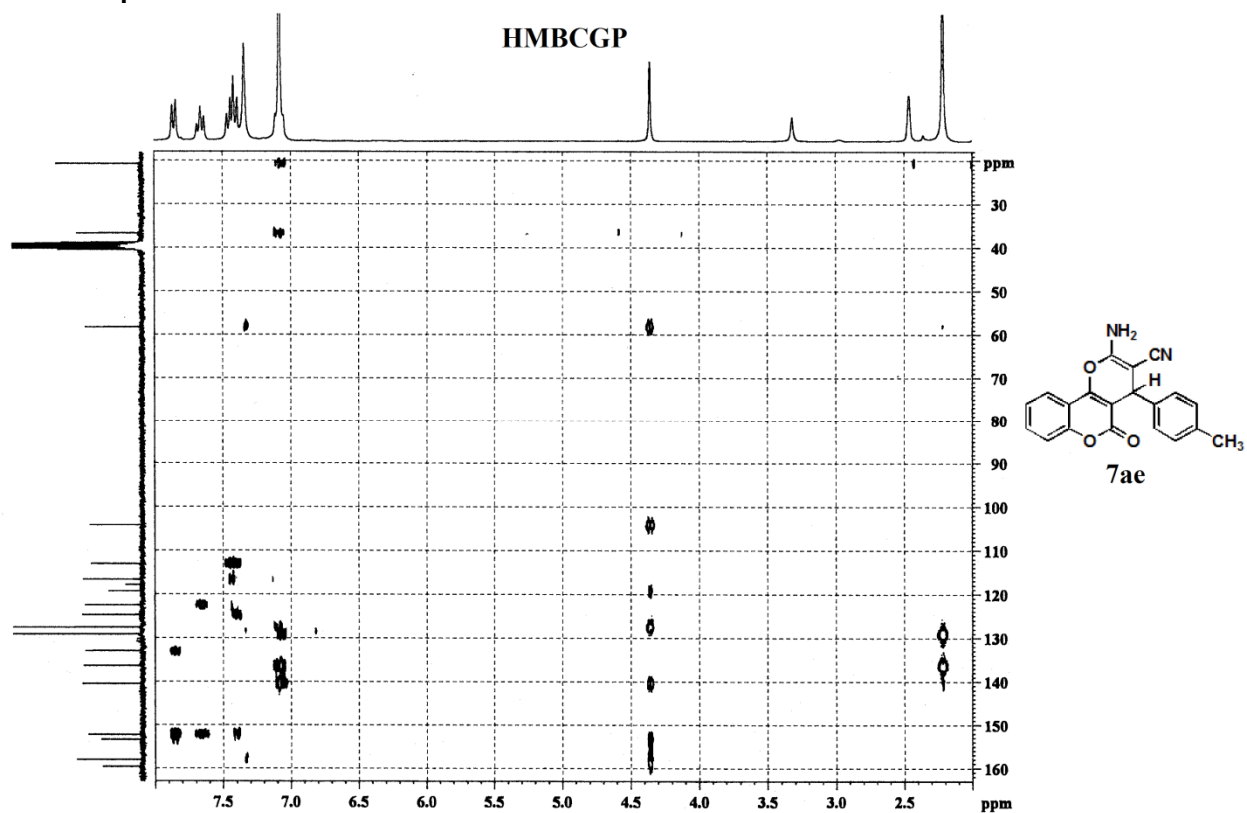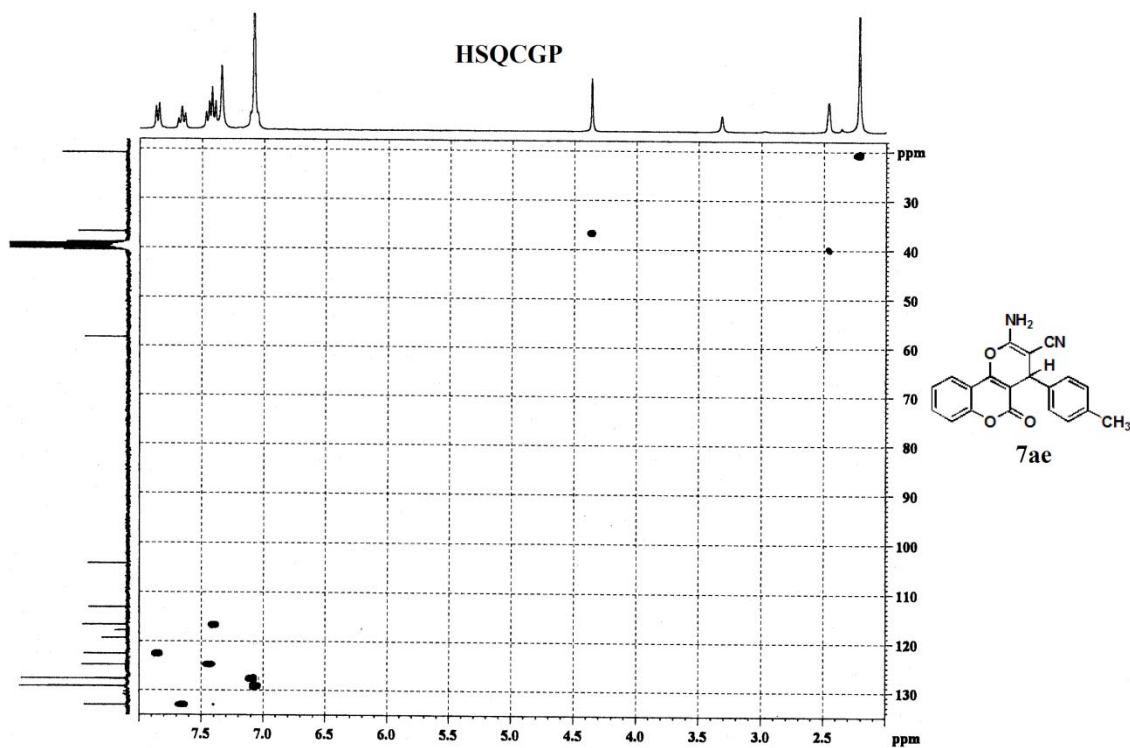

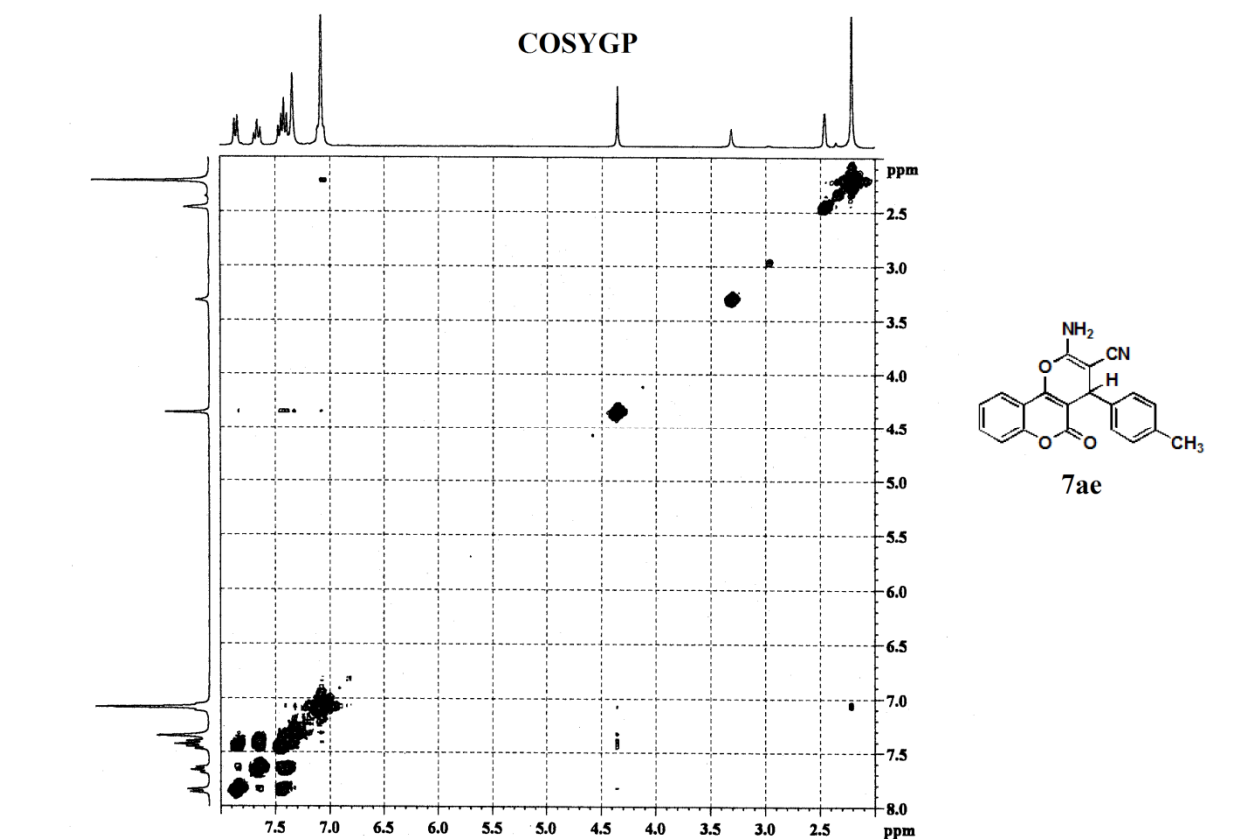

2D NMR spectrum of **7ay**

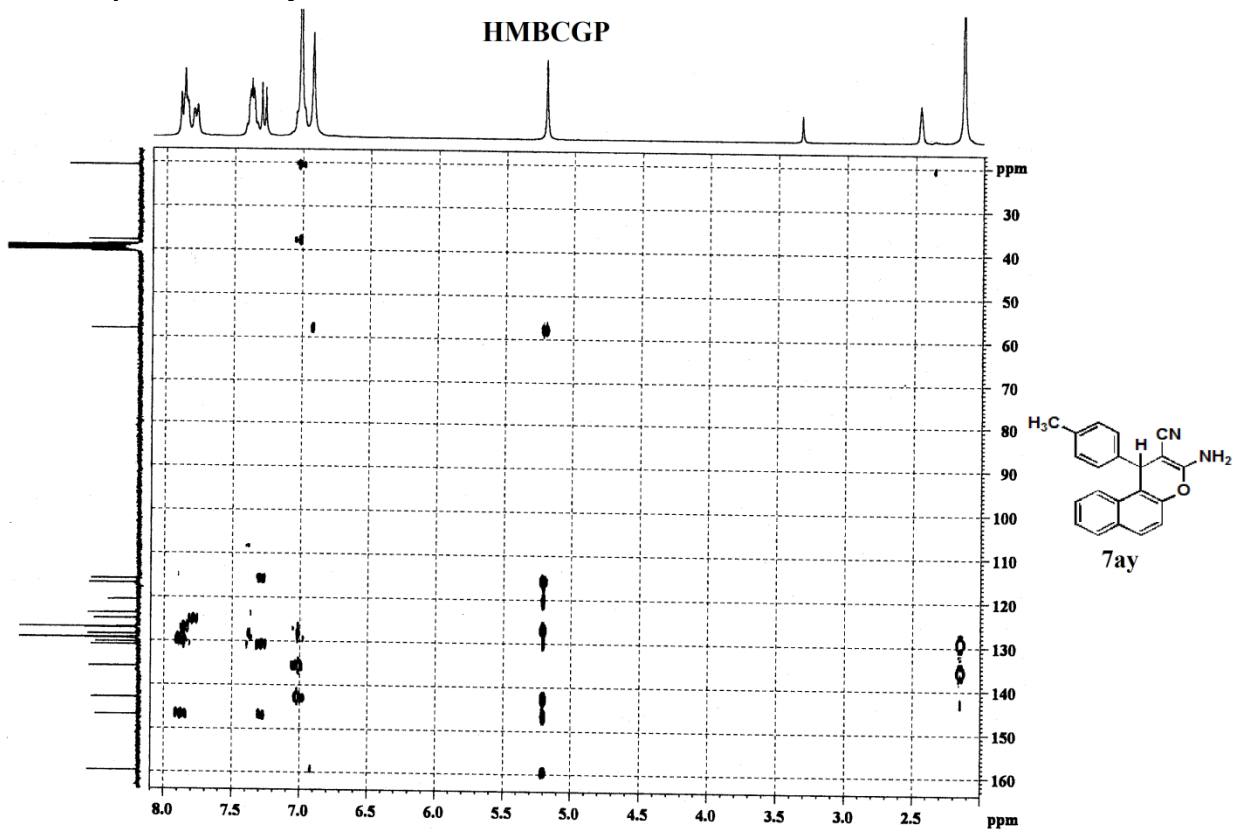

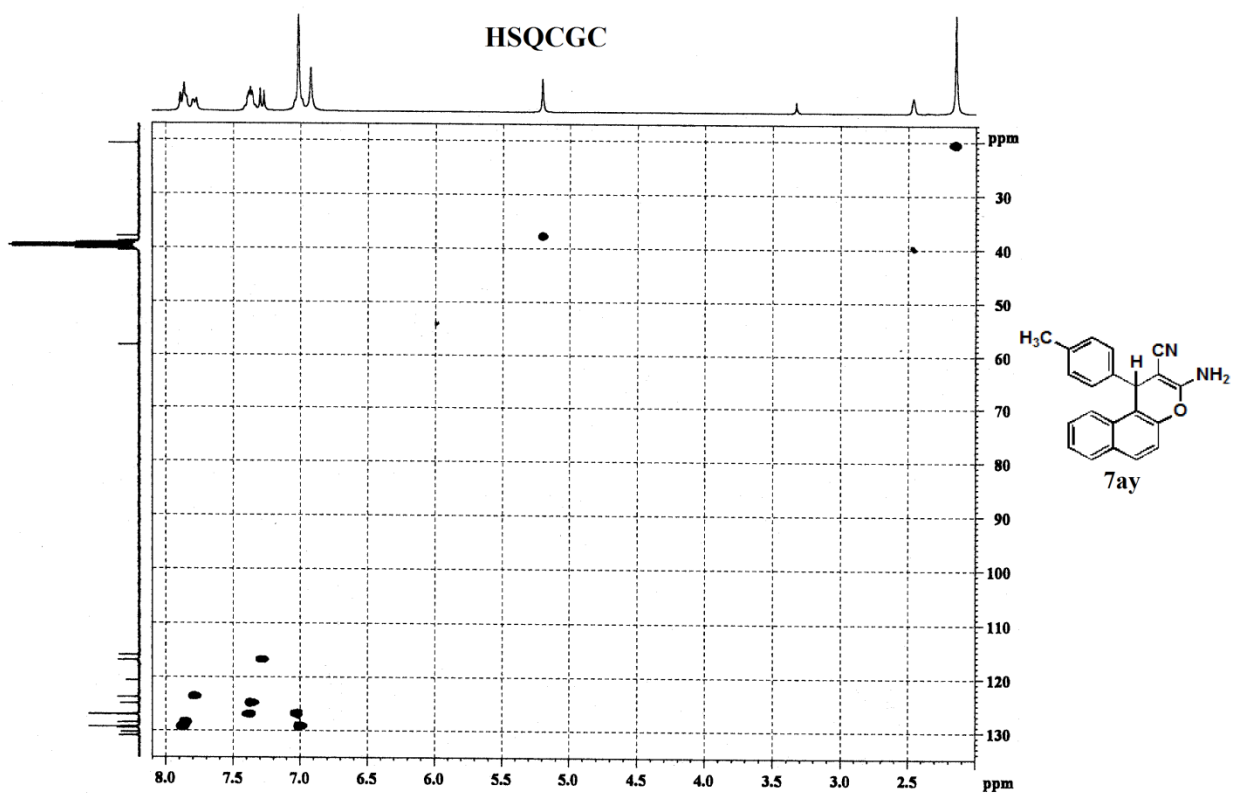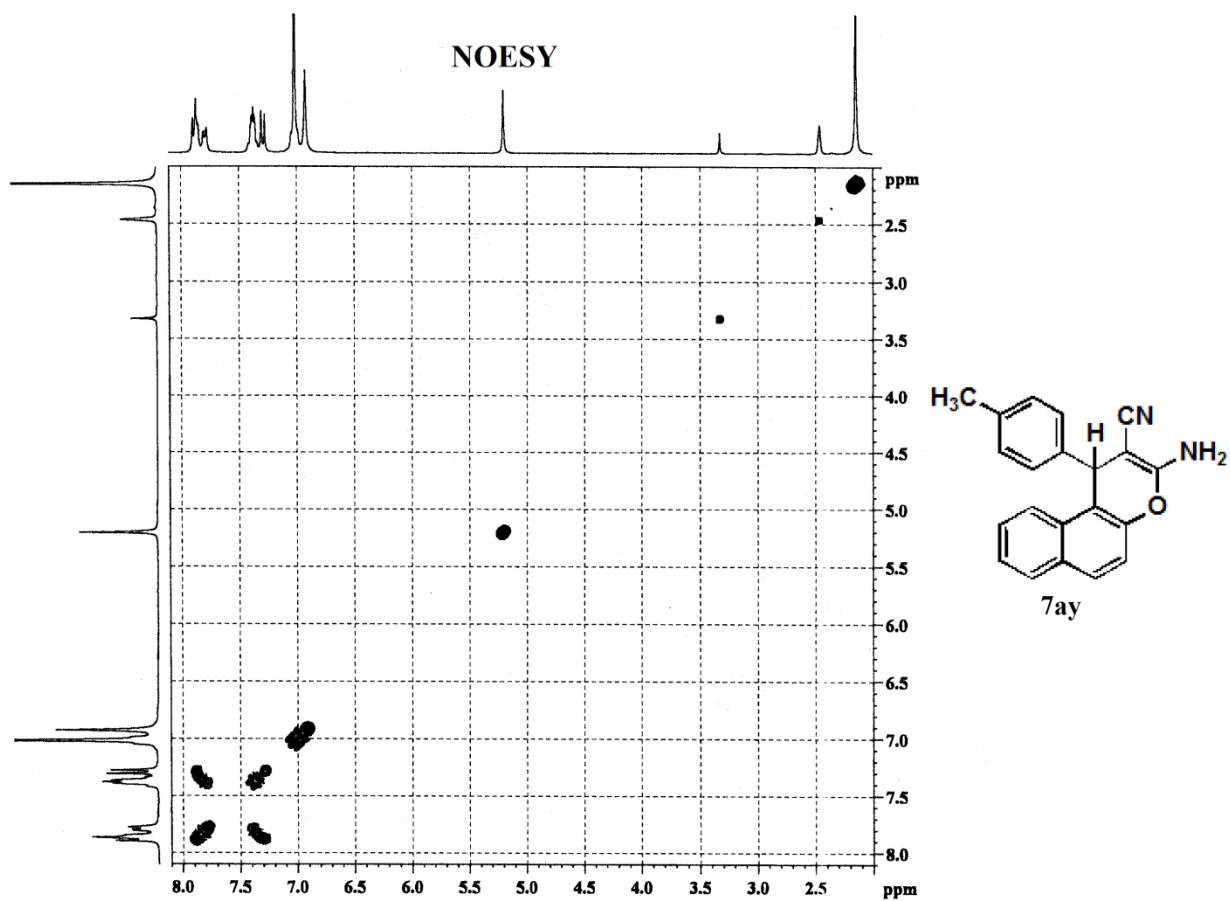

Supplement: c3gc42095g_4.pdf [file c3gc42095g_4.pdf]
